# Supplementary material for: Fine tuning and orientation control of surface Cu complexes on TiO2(110) premodified with mercapto compounds: the effect of different mercapto group positions
Source: Royal Society of Chemistry journal article supplement (doi:10.1039/c3cp51425k), 2013-01-01
Supplement: c3cp51425k.pdf [file c3cp51425k.pdf]

## Supplementary Information

### Fine Tuning and Orientation Control of Surface Cu Complexes on TiO<sub>2</sub>(110) Premodified with Mercaptobenzoate Molecules: Effect of Different Mercapto Group Positions

Satoru Takakusagi,<sup>1\*</sup> Hirotaka Nojima,<sup>1</sup> Hiroko Ariga,<sup>1</sup> Hiromitsu Uehara<sup>1</sup>, Kotaro Miyazaki,<sup>1</sup>  
Wang-Jae Chun,<sup>2</sup> Yasuhiro Iwasawa,<sup>3</sup> Kiyotaka Asakura<sup>1\*</sup>

<sup>1</sup> Catalysis Research Center, Hokkaido University, Sapporo, Hokkaido 001-0021, Japan,

<sup>2</sup> Department of Material Sciences, International Christian University, Mitaka, Tokyo 181-8585, Japan,

<sup>3</sup> Department of Engineering Science, The University of Electro-Communications, Chofu, Tokyo 182-8585, Japan

\*Corresponding authors

Supplementary information contains the following figures and tables.

**Figure S1.** Spectroscopic ellipsometry measurements of a typical mercaptobenzoic acid (MBA) layer on TiO<sub>2</sub>(110) (*o*-MBA/TiO<sub>2</sub>(110)) and the *o*-MBA/TiO<sub>2</sub>(110) sample after annealing at 200 °C for 1 h in UHV.

**Figure S2.** Cu K-edge XANES and EXAFS spectra of Cu/*o*-MBA/TiO<sub>2</sub>(110) after exposure to air or after annealing at 200 °C for 1 h in UHV.

**Figure S3~S5.** Side and top views of the model structures for Cu/*o*-, *m*- and *p*-MBA/TiO<sub>2</sub>(110), respectively. And their selected atomic coordinates used for theoretical calculation of the EXAFS oscillations are also shown in **Table S1~Table S3**.

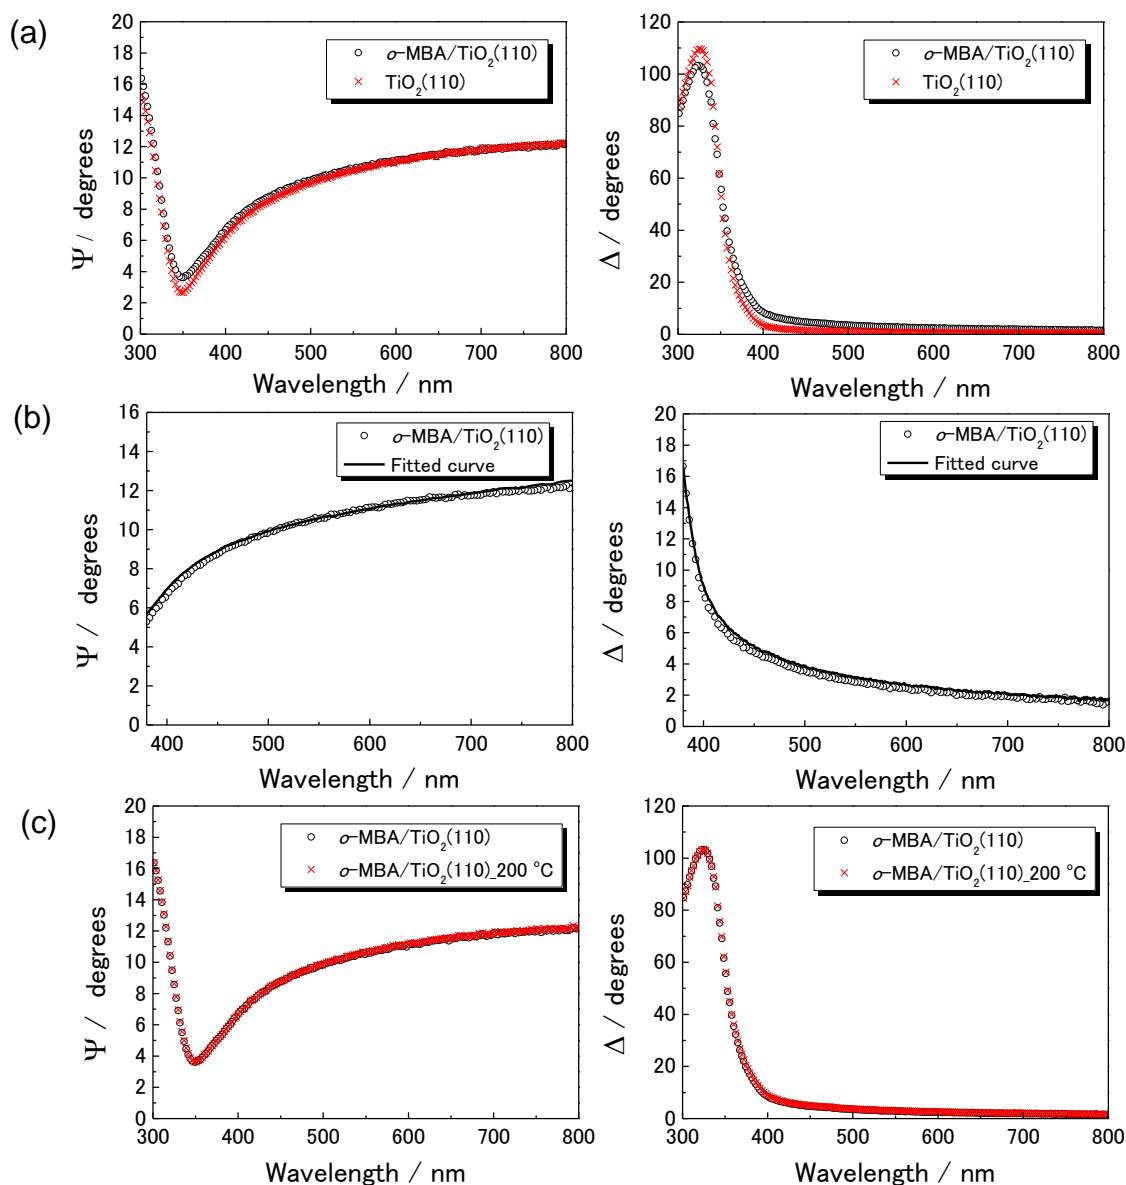

**Figure S1.** Spectroscopic ellipsometry measurements (GES5E, Semilab) of a typical mercaptobenzoic acid (MBA) layer on TiO<sub>2</sub>(110) (*o*-MBA/TiO<sub>2</sub>(110)) and its thermal stability. (a) Ellipsometric angles  $\Psi$  and  $\Delta$  for the *o*-MBA/TiO<sub>2</sub>(110) (○) and the TiO<sub>2</sub>(110) substrate (×) collected at the incident light angle of 75° from the surface normal. (b) Thickness (*d*) determination of the *o*-MBA layer on TiO<sub>2</sub>(110) by curve fitting using an optical model consisting of air/MBA layer/TiO<sub>2</sub>(110) substrate. The refractive index (*n*) and the extinction coefficient (*k*) of the MBA layer were modeled using the Cauchy expression ( $n(\lambda) = A + B/\lambda^2 + C/\lambda^4$ ,  $k(\lambda) = 0$ ). We confirmed *k* was small enough in the wavelength range of 380–800 nm by UV-Vis absorption measurement of the MBA in ethanol solution. We fixed *C*=0 since its contribution was negligibly small, and the best-fitted result (solid line) was obtained when *A*=1.50, *B*=0.05 μm<sup>2</sup>, and *d*=0.85 nm which is in good agreement with the expected monolayer thickness shown in Figure 1 (~0.8 nm). Four measurements were taken at different locations on the sample surface and the obtained *d* values were reproducible within 0.15 nm. (c) Ellipsometric angles  $\Psi$  and  $\Delta$  for the *o*-MBA/TiO<sub>2</sub>(110) before (○) and after (×) heating at 200°C for 1 h in UHV. No difference was observed before and after the heating, suggesting the MBA layer was thermally stable.

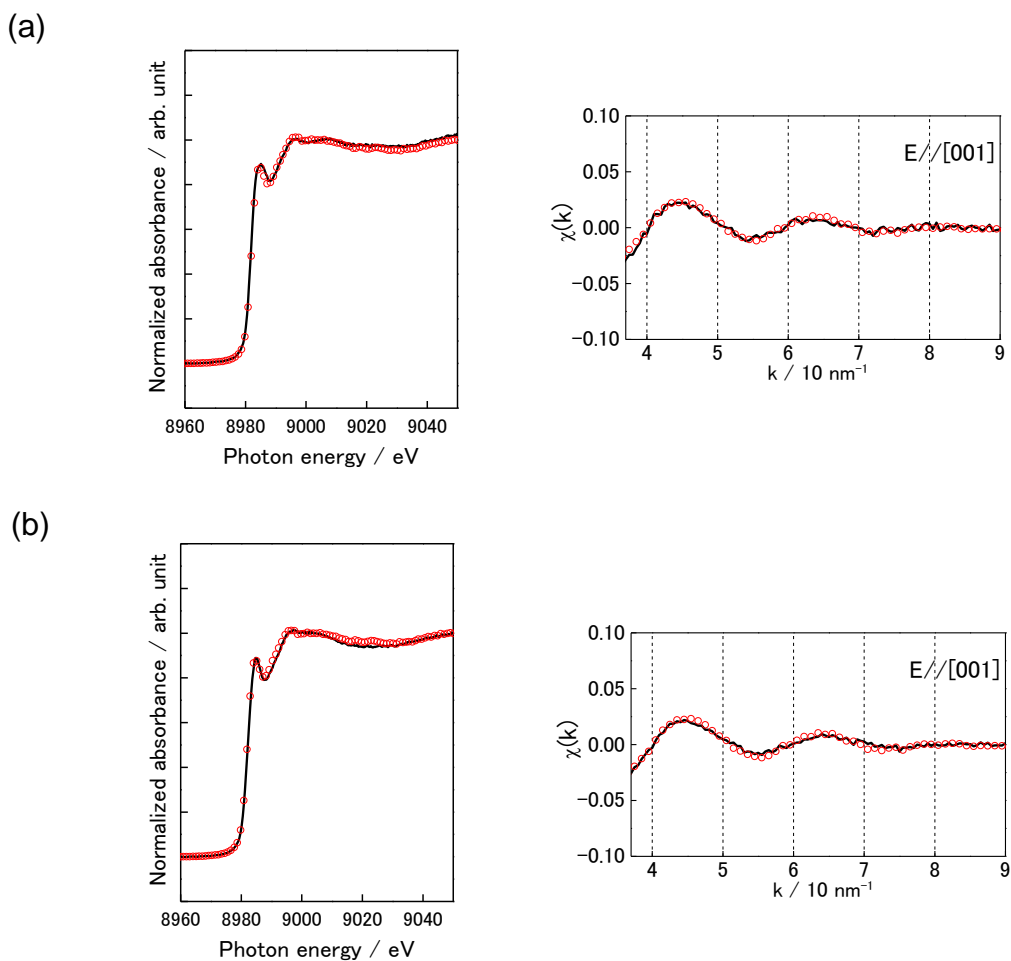

**Figure S2.** Cu K-edge XANES and EXAFS spectra of Cu/*o*-MBA/TiO<sub>2</sub>(110) (a) after exposure to air for 10 min and then transfer back to the UHV chamber ( $E//[001]$ ) or (b) after heating at 200 °C for 1 h in UHV ( $E//[001]$ ). The red circles ( $\circ$ ) show the XANES and EXAFS spectra before each treatment (the same spectra with those shown in Figure 2 (a) (XANES at  $E//[001]$ ) and Figure 3 (a) (EXAFS at  $E//[001]$ )). No significant difference was recognized before and after each treatment and Cu-S (0.219 nm) and Cu-O (0.185 nm) bonds were detected in the EXAFS spectra, suggesting the Cu species was stable after air exposure and heating at 200 °C in UHV.

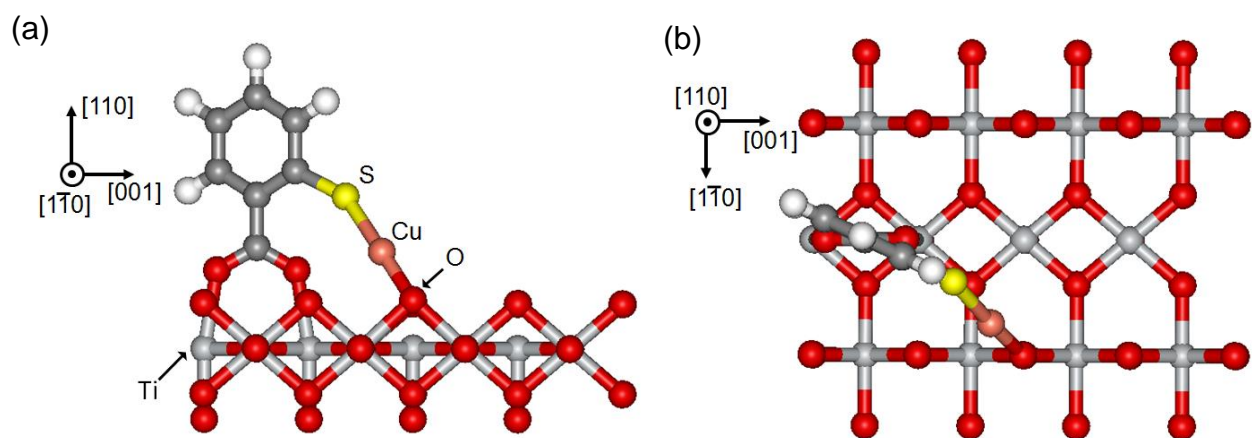

**Figure S3.** (a) Side and (b) top views of the proposed model structure for Cu/o-MBA/TiO<sub>2</sub>(110).

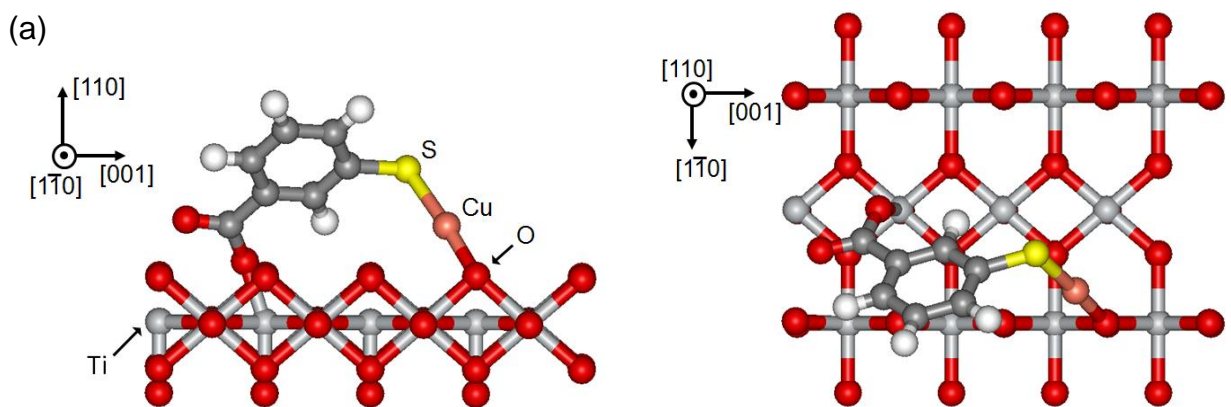

**Figure S4.** (a) Side and (b) top views of the proposed model structure for Cu/m-MBA/TiO<sub>2</sub>(110).

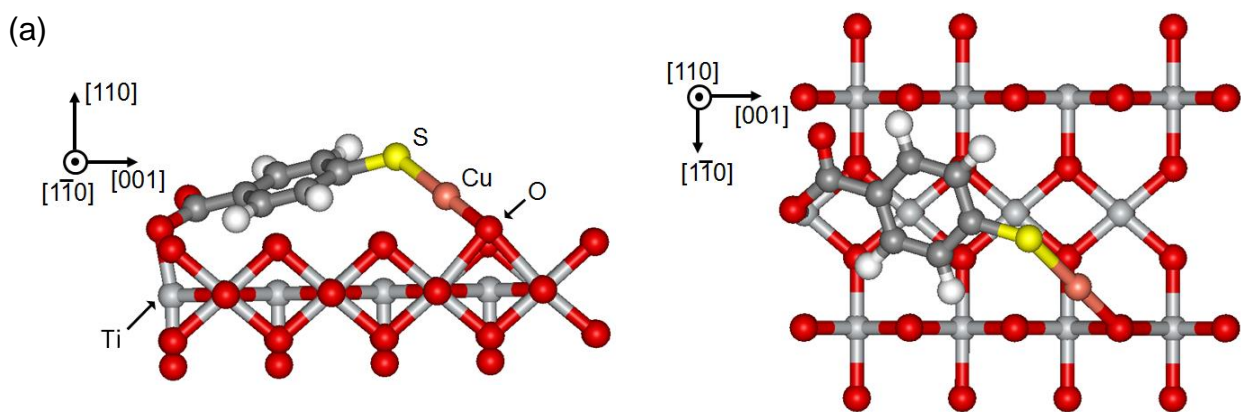

**Figure S5.** (a) Side and (b) top views of the proposed model structure for Cu/p-MBA/TiO<sub>2</sub>(110).

**Table S1.** Selected atomic coordinates used for theoretical calculation of the EXAFS oscillations for Cu/*o*-MBA/TiO<sub>2</sub>(110).

| Atoms | X / Å | Y / Å | Z / Å |
|-------|-------|-------|-------|
| C     | 1.84  | 2.81  | 2.82  |
| C     | 1.11  | 3.94  | 3.38  |
| C     | 0.01  | 4.47  | 2.70  |
| C     | 1.51  | 4.48  | 4.60  |
| C     | 0.81  | 5.56  | 5.14  |
| C     | -0.68 | 5.55  | 3.24  |
| C     | -0.29 | 6.09  | 4.46  |
| Cu    | -0.33 | 3.02  | -0.83 |
| H     | 2.37  | 4.06  | 5.13  |
| H     | 1.12  | 5.99  | 6.10  |
| H     | -1.55 | 5.97  | 2.70  |
| H     | -0.84 | 6.95  | 4.89  |
| O     | 1.24  | 1.99  | 2.01  |
| O     | 3.08  | 2.62  | 3.14  |
| O     | -0.13 | 2.20  | -2.47 |
| S     | -0.59 | 3.88  | 1.18  |
| Ti    | 4.46  | 0.99  | 2.49  |
| Ti    | 2.04  | 0.16  | 1.01  |
| Ti    | -0.66 | 0.72  | -3.72 |
| Ti    | 1.76  | 1.55  | -2.24 |

**Table S2.** Selected atomic coordinates used for theoretical calculation of the EXAFS oscillations for Cu/*m*-MBA/TiO<sub>2</sub>(110).

| Atoms | X / Å | Y / Å | Z / Å |
|-------|-------|-------|-------|
| C     | 2.87  | 3.09  | -0.16 |
| C     | 2.31  | 2.37  | 0.90  |
| C     | 4.19  | 3.54  | -0.08 |
| C     | 4.95  | 3.26  | 1.06  |
| C     | 3.07  | 2.09  | 2.04  |
| C     | 4.39  | 2.54  | 2.11  |
| C     | 2.48  | 1.32  | 3.17  |
| Cu    | 1.90  | 1.80  | -3.03 |
| H     | 4.63  | 4.10  | -0.91 |
| H     | 5.99  | 3.61  | 1.12  |
| H     | 1.27  | 2.02  | 0.84  |
| H     | 5.00  | 2.32  | 3.01  |
| O     | 1.90  | 0.34  | -4.16 |
| O     | 1.14  | 0.76  | 3.04  |
| O     | 3.13  | 1.16  | 4.22  |
| S     | 1.92  | 3.43  | -1.57 |
| Ti    | 1.82  | -1.14 | -2.82 |
| Ti    | 0.94  | -0.67 | -5.60 |
| Ti    | 0.31  | -0.71 | 2.45  |

**Table S3.** Selected atomic coordinates used for theoretical calculation of the EXAFS oscillations for Cu/*p*-MBA/TiO<sub>2</sub>(110).

| Atoms | X / Å | Y / Å | Z / Å |
|-------|-------|-------|-------|
| C     | 1.46  | 2.64  | 0.71  |
| C     | 2.33  | 1.67  | 1.23  |
| C     | 0.52  | 3.24  | 1.55  |
| C     | 0.45  | 2.88  | 2.90  |
| C     | 2.26  | 1.31  | 2.57  |
| C     | 1.32  | 1.92  | 3.41  |
| C     | 1.25  | 1.54  | 4.85  |
| Cu    | 1.90  | 1.79  | -2.74 |
| H     | -0.16 | 4.00  | 1.15  |
| H     | -0.29 | 3.36  | 3.56  |
| H     | 3.07  | 1.19  | 0.57  |
| H     | 2.95  | 0.55  | 2.97  |
| O     | 2.21  | 0.69  | -4.26 |
| O     | 2.10  | 0.54  | 5.50  |
| O     | 0.36  | 2.16  | 5.46  |
| S     | 1.55  | 3.08  | -0.96 |
| Ti    | 2.00  | -1.11 | -2.93 |
| Ti    | 1.11  | -0.64 | -5.71 |
| Ti    | 1.37  | -1.15 | 5.12  |
